# Supplementary material for: Large Rab GTPase Rab44 regulates microtubule-dependent retrograde melanosome transport in melanocytes
Source: PubMed Central journal article supplement (PMC9586991; doi:10.1016/j.jbc.2022.102508), 2022-09-17
Supplement: mmc1.pdf [file mmc1.pdf]

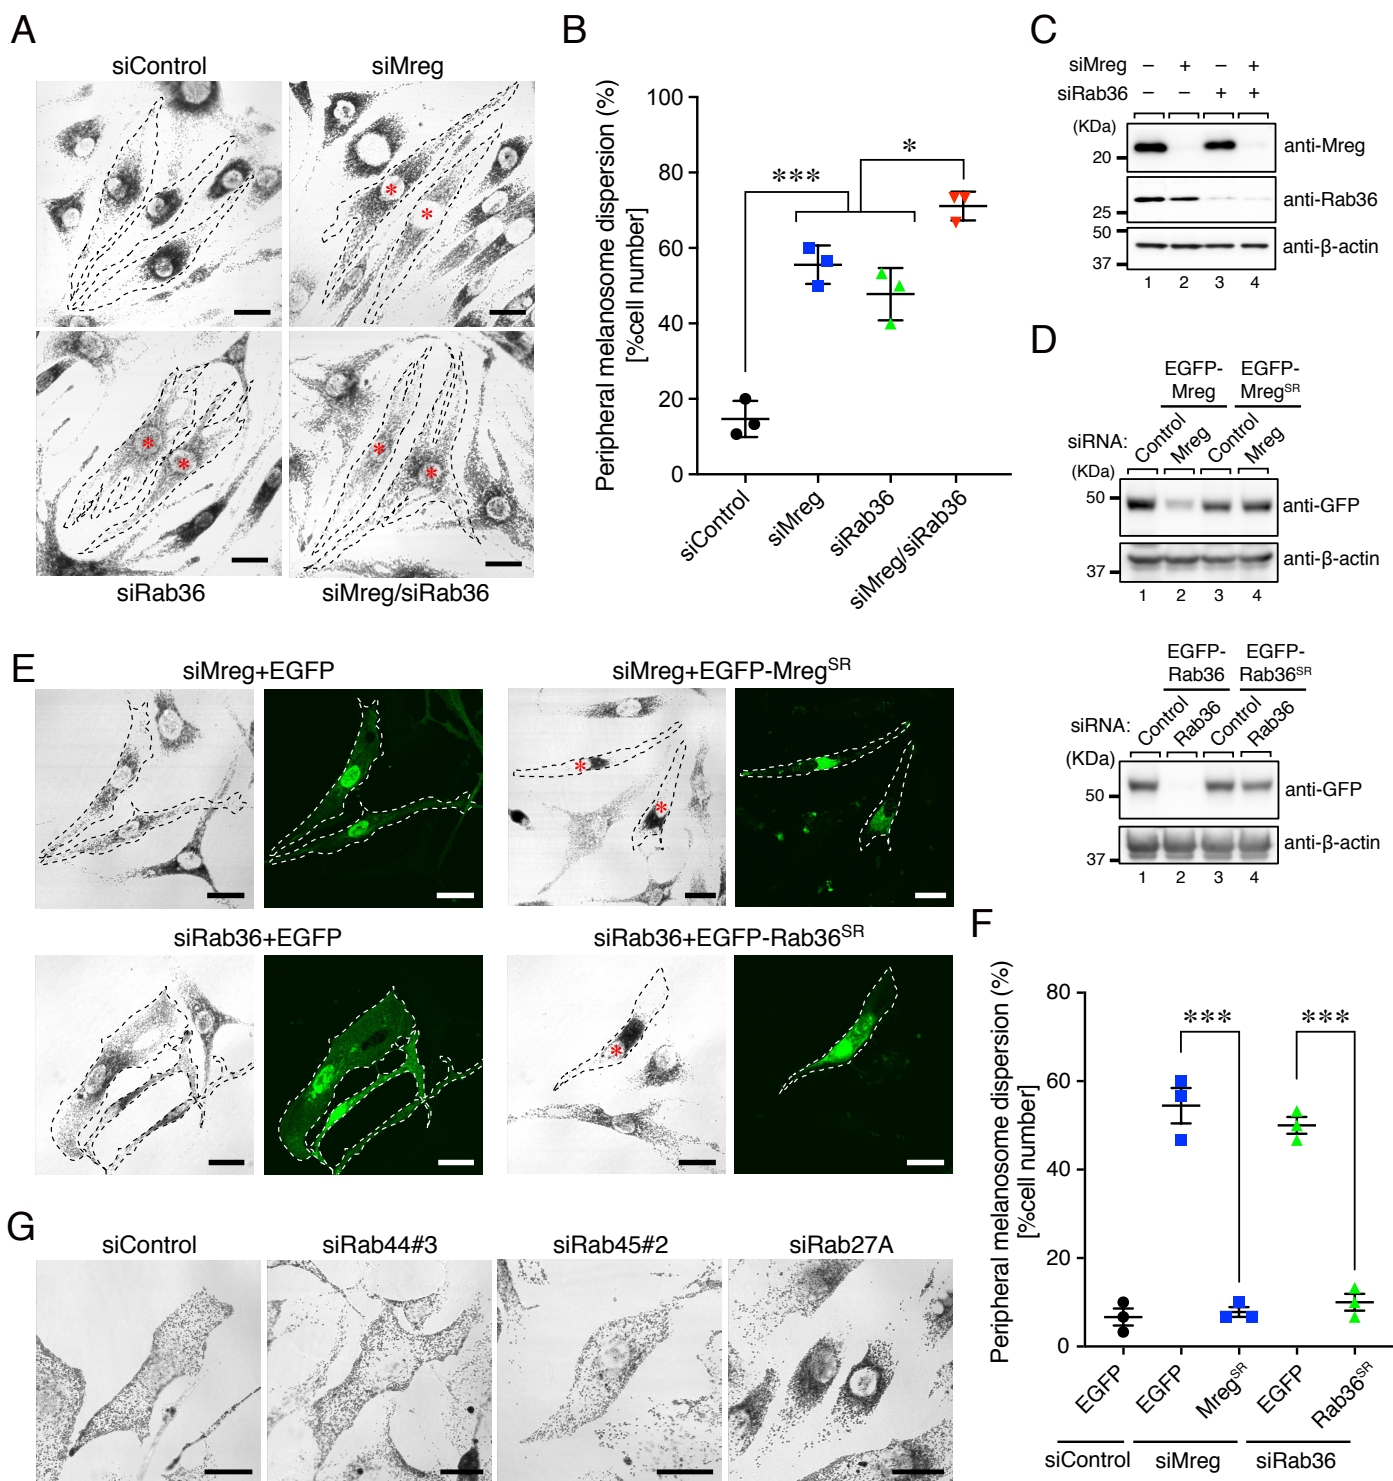

**Figure S1. Effect of double knockdown of Mreg and Rab36 on melanosome distribution in melan-ash cells and effect of knockdown of large Rabs on melanosome distribution in melan-a cells.** (A) Typical images of melan-ash cells (outlined with broken lines) that had been treated with the siRNAs indicated, i.e., control siRNA (siControl), *Mreg* siRNA (siMreg), *Rab36* siRNA (siRab36), and *Mreg* siRNA + *Rab36* siRNA (siMreg/siRab36). The red asterisks indicate the cells showing peripheral melanosome distribution, in contrast to the control melan-ash cells, which exhibit perinuclear melanosome aggregation. Scale bars, 20  $\mu$ m. (B) The percentage of cells showing peripheral melanosome distribution shown in (A). The error bars represent the means  $\pm$  S.E. of the data obtained in three independent experiments ( $n > 25$  cells in each experiment). \*,  $p < 0.05$ ; \*\*\*,  $p < 0.001$  (one-way ANOVA and Tukey's test). (C) Knockdown efficiency of Mreg and Rab36 proteins as revealed by immunoblotting with the antibodies indicated. (D) An siRNA-resistant (SR) mutants of Mreg and Rab36 are shown. siRNAs and pGFP-C1 plasmids were co-transfected into COS-7 cells, and their lysates were analyzed by immunoblotting with the antibodies indicated. Data in (C) and (D) are representative of at least two independent experiments, and similar results were obtained in each experiment. (E) Typical images of Mreg<sup>SR</sup>- or Rab36<sup>SR</sup>-expressing melan-ash cells (outlined with broken lines; \*, rescued cells) that had been treated with the siRNAs indicated. (F) The percentage of cells showing peripheral melanosome distribution shown in (E). The error bars represent the means  $\pm$  S.E. of the data obtained in three independent experiments ( $n > 25$  cells in each experiment). \*\*\*,  $p < 0.001$  (one-way ANOVA and Tukey's test). (G) Typical images of melan-a cells that had been treated with control siRNA (siControl), *Rab44* siRNA (siRab44#3), *Rab45* siRNA (siRab45#2), or *Rab27A* siRNA (siRab27A). Scale bars, 20  $\mu$ m.

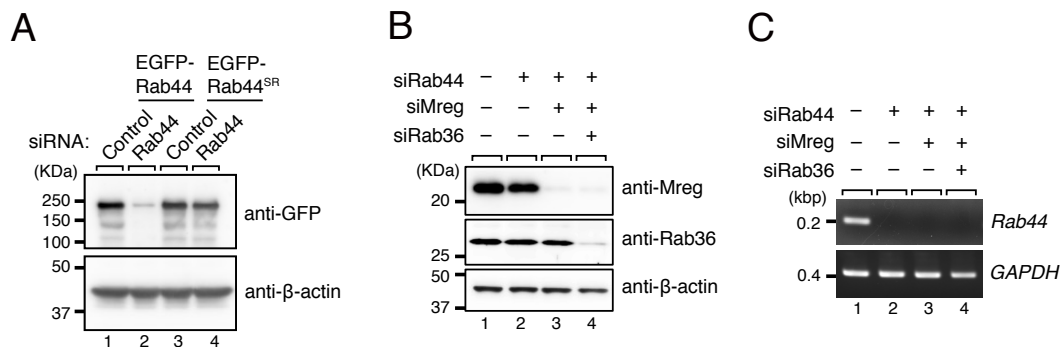

**Figure S2. Knockdown efficiency of siRNAs against Rab44, Mreg, and Rab36 in melan-ash cells.** (A) Knockdown efficiency of *Rab44* siRNA (siRab44#3) toward recombinant mouse Rab44 and an siRNA-resistant mutant of Rab44 (Rab44<sup>SR</sup>) in COS-7 cells (see Figs. 1C and 2A). (B) Knockdown efficiency of *Mreg* siRNA (siMreg) and *Rab36* siRNA (siRab36) as revealed by immunoblotting with specific antibodies (see Fig. 6A). (C) Knockdown efficiency of *Rab44* siRNA (siRab44#3) as revealed by RT-PCR analysis (see Fig. 6A). Data in (A)–(C) are representative of at least two independent experiments, and similar results were obtained in each experiment.

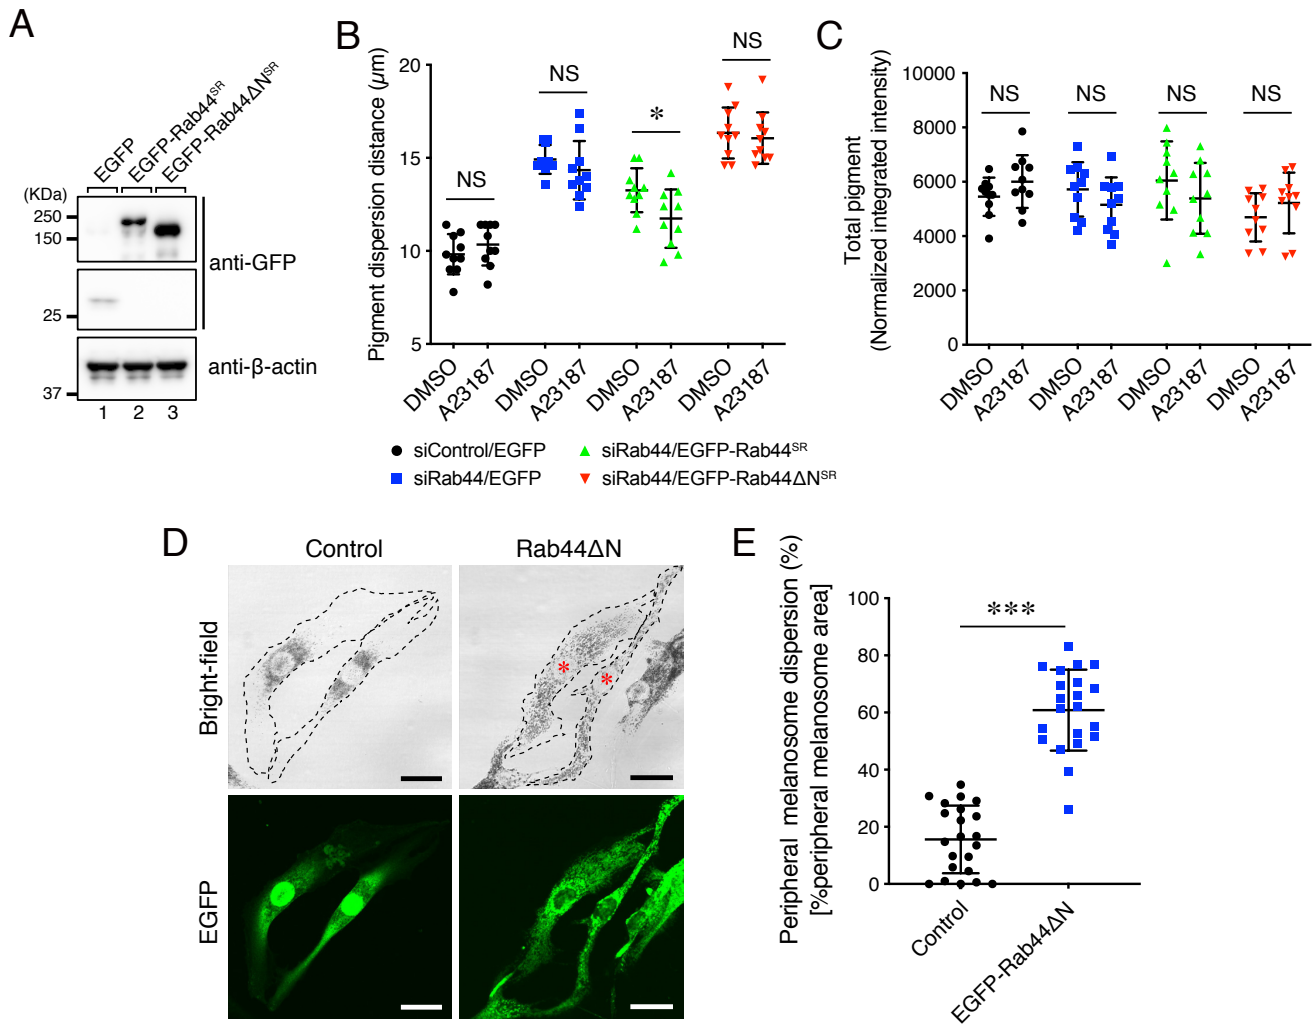

**Figure S3. Re-expression of EGFP-Rab44ΔN in Rab44-depleted melan-ash cells failed to restore perinuclear melanosome distribution.** (A) The protein expression levels of EGFP alone, EGFP-Rab44<sup>SR</sup>, and EGFP-Rab44ΔN<sup>SR</sup> in the melan-ash cells shown in Fig. 7B. The cell lysates were analyzed by immunoblotting with the antibodies indicated. The positions of the molecular mass markers (KDa) are shown on the left. The blots shown are representative of two independent experiments. (B) The PDD is the distance from the center of the circle containing 95% of the total signal intensity of the subcellular melanosomes in the cells shown in Fig. 7B. (C) Total pigment means the total signal intensity of the intracellular melanosomes within the circles in Fig. 7B. The error bars in (B) and (C) represent the means ± S.D. (n = 10 cells). \*,  $p < 0.05$ ; NS, not significant (two-way ANOVA and Bonferroni test). (D) Typical images of melan-ash cells stably expressing EGFP alone or EGFP-Rab44ΔN (Rab44ΔN<sup>SR</sup>). The red asterisks indicate the cells (outlined with broken lines) showing hyper-dispersion of melanosomes. Scale bars, 20 μm. (E) The percentage of peripheral melanosome dispersion/cell is shown in (D). The percentage of peripheral melanosome area was calculated as shown in Fig. 2C. The error bars represent the means ± S.D. (n > 20 cells). \*\*\*,  $p < 0.001$  (Student's unpaired *t*-test).

**Table S1. List of materials used in this study**

| Oligonucleotides                                | Sequence (5'-to-3' direction)    | Source                                             |
|-------------------------------------------------|----------------------------------|----------------------------------------------------|
| <b>siRNAs</b>                                   |                                  |                                                    |
| mouse <i>Rab44</i> siRNA#1                      | TCATGACGCTTTTGTACT               | Nippon Gene (Toyama, Japan)                        |
| mouse <i>Rab44</i> siRNA#2                      | ACCTGCTGGTAGACAACAA              | Nippon Gene (Toyama, Japan)                        |
| mouse <i>Rab44</i> siRNA#3                      | GAGATCAGCTTGCTTTTGA              | Nippon Gene (Toyama, Japan)                        |
| mouse <i>Rab45</i> siRNA#1                      | GGAGTTGATTCCAAATGA               | Nippon Gene (Toyama, Japan)                        |
| mouse <i>Rab45</i> siRNA#2                      | CGATGTTACTTGTGAGAAA              | Nippon Gene (Toyama, Japan)                        |
| mouse <i>Rab45</i> siRNA#3                      | GCAAATCCATGATTTAACA              | Nippon Gene (Toyama, Japan)                        |
| mouse <i>p150<sup>Glued</sup></i> siRNA         | Not available                    | Thermo Fisher (Waltham, MA) MSS203510              |
| mouse <i>Mreg</i> siRNA                         | TCCGTATTCTCCCTTTGGA              | Nippon Gene (Toyama, Japan)                        |
| mouse <i>Rab36</i> siRNA                        | AGACTAGCCTCATTACAG               | (46) <i>EMBO Rep.</i> (2013) 14, 450-457           |
| mouse <i>Rab27A</i> siRNA                       | AAGAGAGTGGTGTACAGAG              | (46) <i>EMBO Rep.</i> (2013) 14, 450-457           |
| <b>Primers for mutagenesis and construction</b> |                                  |                                                    |
| Rab44-Met                                       | GGATCCATGGAGAAAGGAAAGGGAGT       | Nippon Gene (Toyama, Japan)                        |
| Rab44-EF-C                                      | GCGTCGACTCACTTTCTCAGGGTCCATGCCAG | Nippon Gene (Toyama, Japan)                        |
| Rab44-MID-N                                     | TGCGGATCCCTGGCATGGACCTGAGAAAAG   | Nippon Gene (Toyama, Japan)                        |
| Rab44-MID-C                                     | GCGTCGACTCACTTAGCATGGCTCTCCTGCCT | Nippon Gene (Toyama, Japan)                        |
| Rab44-RAB-N                                     | TGCGGATCCAGGAGGAGGCCATGCTAAG     | Nippon Gene (Toyama, Japan)                        |
| Rab44-RAB-C                                     | GCGTCGACTCAGTGGCAGCAGCCAGCTCTCTT | Nippon Gene (Toyama, Japan)                        |
| Rab44-RAB-C-Δstop                               | AGCGAATTCCTTAGCATGGCTCTCCTGCCT   | Nippon Gene (Toyama, Japan)                        |
| Rab44-SR-5'                                     | TTCAGGGACCAACTAGCATTGAGGCTGAG    | Nippon Gene (Toyama, Japan)                        |
| Rab44-SR-3'                                     | CTCAGCCTCGAATGCTAGTTGGTCCCTGAA   | Nippon Gene (Toyama, Japan)                        |
| Rab44-Q844L-5'                                  | GACACAGCTGGACTCGAGAGGTACCAC      | Nippon Gene (Toyama, Japan)                        |
| Rab44-Q844L-3'                                  | GTGGTACCTCTCAGTCCAGCTGTGTC       | Nippon Gene (Toyama, Japan)                        |
| Rab44-T799N-5'                                  | AATGTGGGCAAGAATTCATTCTACAC       | Nippon Gene (Toyama, Japan)                        |
| Rab44-T799N-3'                                  | GTGTAGGAATGAATCTTGCCACATT        | Nippon Gene (Toyama, Japan)                        |
| Rab44-C971A/C972A-3'                            | GCGTCGACTCAGTGGGCGGCCAGCTC       | Nippon Gene (Toyama, Japan)                        |
| Mreg-SR-5'                                      | AACAATCCATACTCATCATTGCGCGGACT    | Nippon Gene (Toyama, Japan)                        |
| Mreg-SR-3'                                      | AGTCGCGCCGAATGATGAGTATGGATTGTT   | Nippon Gene (Toyama, Japan)                        |
| <b>RT-PCR primers</b>                           |                                  |                                                    |
| GAPDH-forward                                   | ACCACAGTCCATGCCATCAC             | Eurofins Genomics (Tokyo, Japan)                   |
| GAPDH-reverse                                   | TCCACCACCCTGTTGCTGTA             | Eurofins Genomics (Tokyo, Japan)                   |
| Rab44-forward Nested 1st                        | ATGCCTGTTCAGGTGGAGAGC            | Eurofins Genomics (Tokyo, Japan)                   |
| Rab44-reverse Nested 1st                        | TCAGTGGCAGCAGCCAGCTCT            | Eurofins Genomics (Tokyo, Japan)                   |
| Rab44-forward Nested 2nd                        | TTACTGGCTCGACTGTCTGC             | Eurofins Genomics (Tokyo, Japan)                   |
| Rab44-reverse Nested 2nd                        | TGCATCTTAAGTGACCGAGCC            | Eurofins Genomics (Tokyo, Japan)                   |
| Rab45-forward                                   | GGTGAGGCGAGCACTCTTAG             | Eurofins Genomics (Tokyo, Japan)                   |
| Rab45-reverse                                   | TCCCCTGCAAGATGGAGAAC             | Eurofins Genomics (Tokyo, Japan)                   |
| Mreg-forward                                    | GGATCCAATTTATGGAGCATGCCT         | (19) <i>J Cell Sci.</i> (2012) 125, 1508-1518      |
| Mreg-reverse                                    | GTCGACCATTGGCTAGCAATCTT          | (19) <i>J Cell Sci.</i> (2012) 125, 1508-1518      |
| Rab36-Met                                       | CGGATCCATGAGGCTCTCTGGACCCC       | (47) <i>J. Biol. Chem.</i> (2003) 278, 15373-15380 |
| Rab36-stop                                      | TTAACAGCAGCCTAGCCGG              | (47) <i>J. Biol. Chem.</i> (2003) 278, 15373-15380 |
| <b>Plasmids</b>                                 |                                  |                                                    |
| pEF-FLAG-GST                                    |                                  | (48) <i>Cell Struct. Funct.</i> (2020) 45, 45-55   |
| pEF-FLAG-Rab44 (long form)                      |                                  | This study                                         |
| pEF-FLAG-Rab44ΔN                                |                                  | This study                                         |
| pEF-HA/T7-p150 <sup>Glued</sup>                 | RBD19675                         | (19) <i>J Cell Sci.</i> (2012) 125, 1508-1518      |
| pEGFP-C1                                        |                                  | Clontech-Takara Bio (Shiga, Japan) #6084-1         |
| pEGFP-C1-Rab44 (long form)                      | RBD19676 (RBD17957: short form)  | This study                                         |
| pEF-FLAG-Rab44 <sup>SR</sup> (long form)        |                                  | This study                                         |
| pEGFP-C1-Rab44-Q844L (CA)                       | RBD19677                         | This study                                         |

|                                                       |          |                                                    |
|-------------------------------------------------------|----------|----------------------------------------------------|
| pEGFP-C1-Rab44-T799N (CN)                             | RBD19678 | This study                                         |
| pEGFP-C1-Rab44-EF                                     | RBD19679 | This study                                         |
| pEGFP-C1-Rab44-MID                                    | RBD19680 | This study                                         |
| pEGFP-C1-Rab44-RAB                                    | RBD19681 | This study                                         |
| pEGFP-C1-Rab44-RAB-C971A/C972A                        |          | This study                                         |
| pEGFP-C1-Rab36                                        |          | (20) <i>J. Biol. Chem.</i> (2012) 87, 28619-28631  |
| pEGFP-C1-Rab36 <sup>SR</sup>                          |          | (20) <i>J. Biol. Chem.</i> (2012) 87, 28619-28631  |
| pEGFP-C1-Mreg                                         | RDB15182 | (19) <i>J Cell Sci.</i> (2012) 125, 1508-1518      |
| pEGFP-C1-Mreg <sup>SR</sup>                           |          | This study                                         |
| pGEX-4T-3                                             |          | Merck (Darmstadt, Germany) #GE28-9545-52           |
| pMRX-IRES-puro-EGFP                                   |          | (49) <i>J. Biol. Chem.</i> (2003) 278, 36005–36012 |
| pMRX-IRES-puro-EGFP-Rab44 <sup>SR</sup>               |          | This study                                         |
| pMRX-IRES-puro-EGFP-Rab44 <sup>ΔN</sup> <sup>SR</sup> |          | This study                                         |

| Antibodies                                         | Dilution               | Source                                       |
|----------------------------------------------------|------------------------|----------------------------------------------|
| Anti-FLAG tag (M2)-HRP mouse mAb                   | IB (1/1,000 dilution)  | Sigma-Aldrich (St. Louis, MA) A8592          |
| Ant-GFP rabbit pAb                                 | IB (1/1,000 dilution)  | MBL (Nagoya, Japan) 598                      |
| anti-HA tag (3F10)-HRP rat mAb                     | IB (1/500 dilution)    | Roche (Rotkreuz, Switzerland) 12013819001    |
| anti-β-actin-HRP mouse mAb                         | IB (1/5,000 dilution)  | Proteintech (Rosemont, IL) HRP-60008         |
| anti-Dynein Heavy Chain rabbit pAb                 | IB (1/500 dilution)    | Proteintech (Rosemont, IL) 12345-1-AP        |
| anti-p150 <sup>Glued</sup> (1/p150Glued) mouse mAb | IB (1/500 dilution)    | BD Biosciences (Franklin Lakes, NJ) 610474   |
| anti-GST (B-14) mouse mAb                          | IB (1/10,000 dilution) | Santa Cruz Biotechnology (Dallas, TX) sc-138 |
| anti-LAMP1 (1D4B) rat mAb                          | IF (1/100 dilution)    | BD Biosciences (Franklin Lakes, NJ) 553792   |
| anti-Mreg guinea pig pAb                           | IB (0.35 μg/ml)        | This study                                   |
| anti-Rab36 guinea pig serum                        | IB (1/1,000 dilution)  | (50) <i>Biol. Open</i> (2014) 3, 803-814     |

IB, immunoblot; IF, immunofluorescence; mAb, monoclonal antibody; pAb, polyclonal antibody.
